# Supplementary material
Source: PubMed Central journal article supplement (PMC2889032)

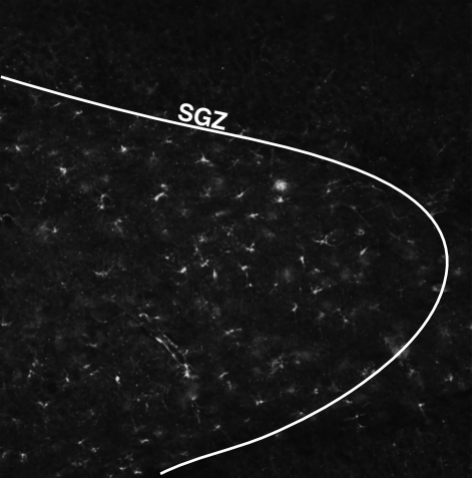

SGZ

Supplement: NIHMS165396-supplement-01.pdf [file NIHMS165396-supplement-01.pdf]

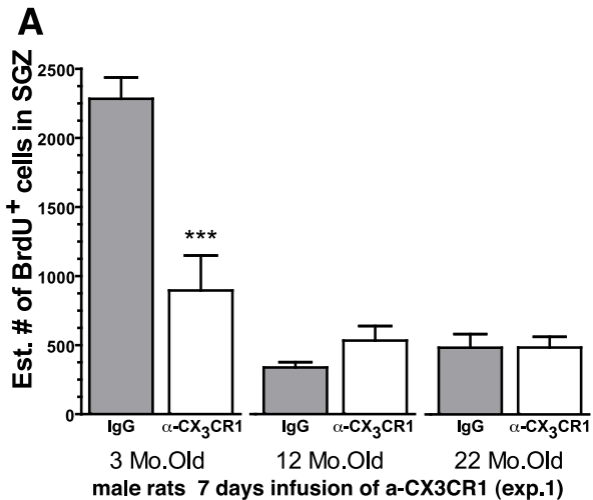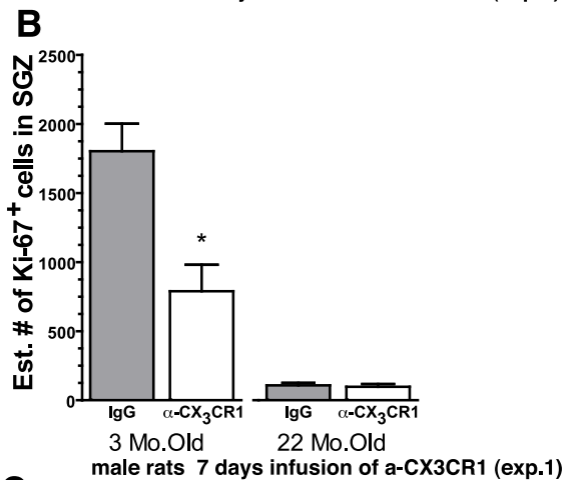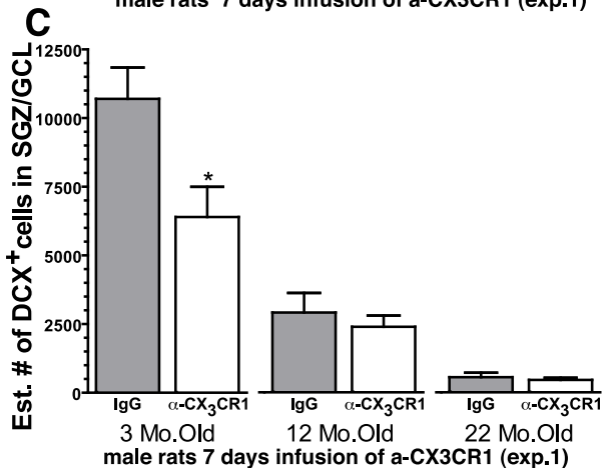

Supplement: NIHMS165396-supplement-02.pdf [file NIHMS165396-supplement-02.pdf]

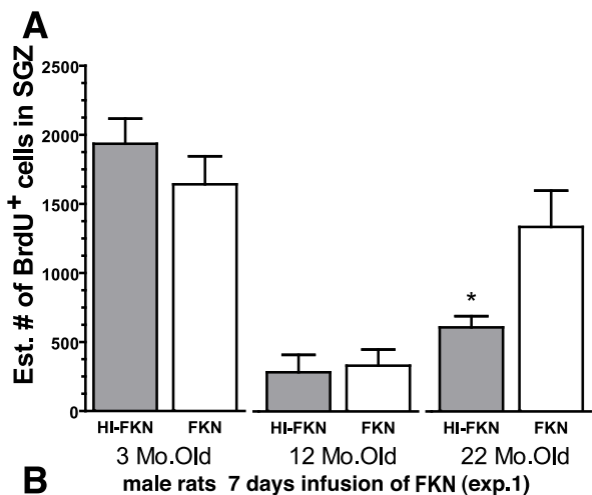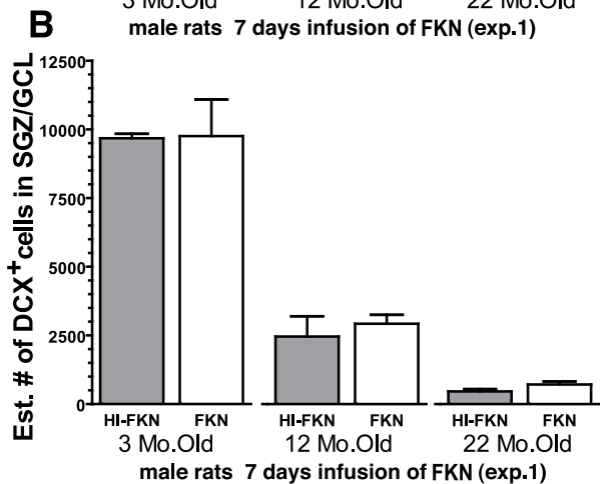

Supplement: NIHMS165396-supplement-03.pdf [file NIHMS165396-supplement-03.pdf]

**A**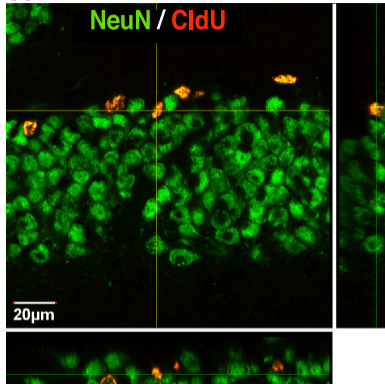**15day IgG treatment****B**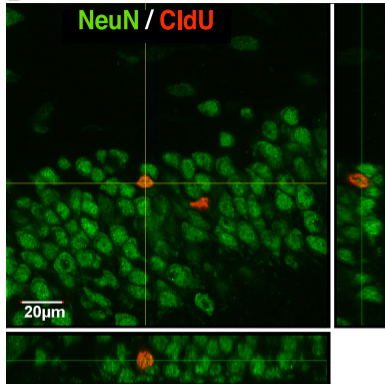**15day  $\alpha$ -CX<sub>3</sub>CR1 treatment****3 month old male F344 rats**

Supplement: NIHMS165396-supplement-04.pdf [file NIHMS165396-supplement-04.pdf]
